# Supplementary material for: Respiratory Syncytial Virus Assembles into Structured Filamentous Virion Particles Independently of Host Cytoskeleton and Related Proteins
Source: PubMed Central journal article supplement (PMC3396619; doi:10.1371/journal.pone.0040826), 2012-07-13
Supplement: pone.0040826.s004.pdf [file pone.0040826.s004.pdf]

# Figure S4. MIRE vesicle proteomics list (1 of 2)

| Protein                                             | 1 | 2 | 3 | 4 | 5 |
|-----------------------------------------------------|---|---|---|---|---|
| <b>Cargo/membrane</b>                               |   |   |   |   |   |
| $\alpha$ -1 catenin                                 | X | X | X | X | X |
| $\alpha$ -2 Integrin                                | X |   | X | X | X |
| Annexin-A2                                          | X | X | X | X | X |
| $\alpha$ -V Integrin                                | X | X |   | X | X |
| $\beta$ -1 Integrin                                 |   | X | X |   | X |
| $\beta$ -3 Integrin                                 |   |   |   | X | X |
| Basigin                                             |   |   |   | X | X |
| ★ $\beta$ -catenin                                  | X | X | X | X | X |
| BSCv (Adipocyte plasma membrane-associated protein) | X |   | X | X |   |
| CLIC 4                                              | X |   |   | X | X |
| $\delta$ -1 catenin                                 | X | X | X | X | X |
| EGFR kinase substrate 8                             | X |   |   | X | X |
| ★ Endometrial Mucin-1                               | X |   |   |   | X |
| Epithelial Cell Adhesion Molecule                   | X |   |   | X | X |
| Galectin-3                                          |   |   |   | X | X |
| Galpha2                                             | X | X |   |   |   |
| Guanine Nucleotide B.P. Alpha 13 subunit            | X |   |   | X | X |
| Guanine Nucleotide B.P. Alpha inhib                 |   |   |   | X | X |
| Guanine Nucleotide B.P. G(s) alpha subunit          | X | X |   | X |   |
| Guanine Nucleotide B.P. G(y) alpha subunit          |   | X | X |   |   |
| ★ MDR-1                                             | X | X | X | X | X |
| Na/K transporting ATPase                            | X | X | X | X | X |
| PDZ domain containing protein1                      | X |   | X | X | X |
| ★ Plasma membrane Ca-transporting ATPase 1          |   |   | X | X |   |
| Solute carrier family 2                             | X |   |   | X |   |
| Solute carrier family 3                             | X | X | X | X |   |
| Vacuole ATP synthase catalytic subunit              | X | X | X | X | X |

| Protein                    | 1 | 2 | 3 | 4 | 5 |
|----------------------------|---|---|---|---|---|
| <b>Vesicle Trafficking</b> |   |   |   |   |   |
| Clathrin heavy chain       | X |   | X | X | X |
| ★ EBP50                    | X | X | X | X | X |
| IQGAP1                     | X |   | X | X | X |
| ★ Myosin 1b                | X |   | X | X | X |
| Myosin 1c                  | X |   | X | X | X |
| Myosin 1d                  | X | X | X | X | X |
| Rab10                      | X | X |   |   | X |
| ★ Rab11                    | X | X |   |   |   |
| Rab7                       | X | X |   |   | X |

| Protein             | 1 | 2 | 3 | 4 | 5 |
|---------------------|---|---|---|---|---|
| <b>Cytoskeletal</b> |   |   |   |   |   |
| $\alpha$ -actinin1  | X | X | X | X | X |
| $\alpha$ -actinin2  |   |   |   | X | X |
| $\alpha$ -actinin4  | X | X | X | X | X |
| ★ Actin             | X | X | X | X | X |
| Ankyrin-3           | X |   |   |   | X |
| ★ Ezrin             | X | X | X | X | X |
| Keratin             | X | X | X | X | X |
| ★ Moesin            | X |   | X | X | X |

| Protein                              | 1 | 2 | 3 | 4 | 5 |
|--------------------------------------|---|---|---|---|---|
| <b>Signalling</b>                    |   |   |   |   |   |
| G protein-coupled receptor family C5 |   |   |   | X | X |
| Inhibitor of NF $\kappa$ B           | X | X |   |   |   |
| Prostaglandin F2                     | X |   | X | X | X |
| Src                                  | X |   | X | X | X |

- ★ Known ARE proteins
- ☆ Known Apical Proteins

The purified population of microsomes was reduced, denatured and subjected to SDS-PAGE. The sample was only electrophoresed about one cm into the gel, and Coomassie stained. This material that formed a smear then was excised, and proteins were in-gel digested and applied to a LC MS/MS mass spectrometer to generate tandem mass spectra and subsequently a list of proteins. High quality identification of proteins that occurred in two or more of five independent analyses (columns 1-5) are shown. Detection in the analysis is indicated by an X.

## Figure S4. MIRE vesicle proteomics list (2 of 2)

### Protein Unknown

|                                                    | 1 | 2 | 3 | 4 | 5 |
|----------------------------------------------------|---|---|---|---|---|
| 2,3-cyclic-nucleotide 3-phosphodiesterase (CNPase) |   |   | X | X |   |
| Cytoplasmic FRM1 interacting protein 1             | X |   |   | X | X |
| FARP1                                              | X |   |   | X | X |
| FERM, RhoGEF                                       |   | X | X | X | X |
| Ferritin L                                         | X | X |   |   | X |
| GNB2                                               |   |   |   | X | X |
| I-plastin                                          | X |   | X | X | X |
| Junction Plakoglobin                               | X | X | X | X | X |
| KIAA1815                                           | X |   | X |   |   |
| Myoferlin                                          | X | X |   |   | X |
| Niban                                              | X | X |   |   |   |
| Nicastrin                                          | X | X |   |   | X |
| Plexin B2                                          | X | X |   | X | X |
| PLS1                                               | X |   |   |   | X |
| prolyl 4-hydroxylase                               | X |   |   | X |   |
| Serine/Threonine-peotein kinase MST4               | X |   |   | X |   |
| Serine/Threonine-protein phosphatase PP1           | X |   |   |   | X |
| Stomatin                                           | X | X |   | X | X |
| thioredoxin                                        | X |   | X | X |   |
| Tissue- alpha-L-fucosidase                         | X | X |   |   |   |

### Protein ER/Golgi

|                                   | 1 | 2 | 3 | 4 | 5 |
|-----------------------------------|---|---|---|---|---|
| Dolichyl-diphosphooligosaccharide | X |   | X | X | X |
| Endoplasmic                       | X | X | X | X | X |
| Gamaglutamyltranspeptidase1       | X | X |   | X | X |
| Glutamyl aminopeptidase           | X |   | X | X |   |
| GRP78                             | X |   | X | X | X |
| HSP70                             | X |   |   |   | X |
| HSP71                             | X |   | X | X | X |
| N-acylsphingosine amidohydrolase  | X | X |   |   |   |
| Protein Disulfide isomerase A3    | X |   | X | X | X |
| Protein Disulfide isomerase A4    | X |   | X |   | X |
| Protein Disulfide isomerase A6    | X |   |   |   | X |

### Protein Lysosomal

|             | 1 | 2 | 3 | 4 | 5 |
|-------------|---|---|---|---|---|
| Cathespin D | X | X |   | X | X |
| LAMP-1      | X | X | X | X |   |

### Protein Mitochondrial

|                            | 1 | 2 | 3 | 4 | 5 |
|----------------------------|---|---|---|---|---|
| Aldehyde dehydrogenase 3B1 | X | X | X | X | X |
| Cytochrome P450            | X | X |   | X | X |
| Cytochrome P450 4A37       | X |   | X | X | X |

The purified population of microsomes was reduced, denatured and subjected to SDS-PAGE. The sample was only electrophoresed about one cm into the gel, and Coomassie stained. This material that formed a smear then was excised, and proteins were in-gel digested and applied to a LC MS/MS mass spectrometer to generate tandem mass spectra and subsequently a list of proteins. High quality identification of proteins that occurred in two or more of five independent analyses (columns 1-5) are shown. Detection in the analysis is indicated by an X.
