# Supplementary material for: Respiratory Syncytial Virus Assembles into Structured Filamentous Virion Particles Independently of Host Cytoskeleton and Related Proteins
Source: PubMed Central journal article supplement (PMC3396619; doi:10.1371/journal.pone.0040826), 2012-07-13
Supplement: pone.0040826.s005.pdf [file pone.0040826.s005.pdf]

**Table S1. Summary of candidate proteins from FCT Y2H screen of a custom lung cDNA library**

| Gene Name     | Frame | Y2H Fragments         | Description                                                     |
|---------------|-------|-----------------------|-----------------------------------------------------------------|
| C1orf43       | ??    | antisense             | HepC NSSA Transactivated                                        |
| COL6A2        | IF    |                       | Collagen $\alpha$ 2 (type IV) chain                             |
| DD5           | IF    |                       | E3 ubiquitin protein ligase, HECT family                        |
| DGAT1         | ??    | antisense             | Diacylglycerol O-acyltransferase homolog 1                      |
| FAM114A2      | ??    | antisense, 3' UTR     | Family with sequence similarity 114, member A2                  |
| FHL2          | IF    |                       | Four and a half LIM domains 2: translational regulation         |
| FLNA var1     | IF    |                       | Filamin A; associated with actin cytoskeleton                   |
| GLUL          | IF    |                       | Glutamate-ammonia ligase                                        |
| GOLGA8A       | ??    | antisense, 3' UTR     | Golgi autoantigen, golgi matrix protein                         |
| HLA-DRB5      | IF    |                       | Major histocompatibility complex, class II, DR $\beta$ 5        |
| HPGD          | ??    | antisense, 3' UTR     | Hydroxyprostaglandin dehydrogenase 15-(NAD)                     |
| HSPA5         | IF    |                       | Heat shock 70kDa protein 5 (glucose-regulated protein, 78 kDa)  |
| LPL           | ??    | antisense, 3' UTR     | Lipoprotein lipase                                              |
| RBM12         | IF    | 3' UTR, IF stop codon | RNA binding motif protein 12                                    |
| RPL23A        | ??    | antisense             | Ribosomal protein L23a                                          |
| SERPINF1      | IF    | IF stop codon         | Serpin peptidase inhibitor, clade F                             |
| SGK269        | ??    | antisense, 3' UTR     | Sugen kinase 269                                                |
| SNRP70        | IF    |                       | Small nuclear ribonucleoprotein 70kDa polypeptide (RNP antigen) |
| SP140         | IF    |                       | SP140 nuclear body protein                                      |
| SRP9          | IF    | antisense, 3' UTR     | Signal recognition particle 9kDa                                |
| TBC1D15       | IF    |                       | TBC1 domain family, member 15; GTPase activating protein        |
| TGF $\beta$ 3 | IF    |                       | Transforming growth factor $\beta$ 3                            |

A Y2H screen was performed by Hybrigenics (Paris, France) using the *wt* FCT peptide fused to LexA at the N-terminus as bait to screen a custom human lung cDNA library. The candidate proteins are listed by their gene name along with a description of the gene and associations. The cDNA fragment also was analyzed for being in frame (IF), unknown frame (??), and whether the interaction was with an antisense strand (antisense) or in the 3' UTR (3' UTR).
