# Supplementary material for: Respiratory Syncytial Virus Assembles into Structured Filamentous Virion Particles Independently of Host Cytoskeleton and Related Proteins
Source: PubMed Central journal article supplement (PMC3396619; doi:10.1371/journal.pone.0040826), 2012-07-13
Supplement: pone.0040826.s006.pdf [file pone.0040826.s006.pdf]

**Table S2. Summary of results available antibodies and shRNAs**

| Gene Name   | Antibody | shRNA | Results                                                                          |
|-------------|----------|-------|----------------------------------------------------------------------------------|
| FHL2        | +        | +     | No co-localization with RSV F; shRNA does affect on viral titers                 |
| FLNA, var 1 | +        | +     | Co-localization with RSV F in viral filaments; shRNA does affect on viral titers |
| GLUL        | +        | +     | No co-localization with RSV F; shRNA does affect on viral titers                 |
| SRP9        | +        | +     | Antibody does not work for IF; shRNA does not affect viral titers                |
| TBC1D15     | +        | +     | Antibody does not work for IF; shRNA does not affect viral titers                |

The available reagents for the FCT Y2H candidate genes are summarized. For genes with available antibodies, HEp-2 cells were inoculated with RSV *wt* strain A2 at an MOI=1.0 for 24 hours. At 24 hours, cells were fixed, and RSV F and the indicated cellular protein were detected by indirect immunofluorescence. For genes with available shRNA lentivirus constructs, HEp-2 cells were transduced with each lentivirus construct. A heterogeneous population was selected using puromycin, and expression of the shRNA was confirmed by concomitant expression of GFP. Cells were then infected with RSV strain A2 at an MOI=0.05 for 72 hours and both supernatant and cell associated virus yields were determined by plaque assay. The results for localization to viral filaments marked by RSV F and affect of shRNA expression on viral yields is summarized.
